# Supplementary material for: A MOF-derived self-template strategy toward cobalt phosphide electrodes with ultralong cycle life and high capacity
Source: Royal Society of Chemistry journal article supplement (doi:10.1039/c7ta02600e), 2017-01-01
Supplement: c7ta02600e1.pdf [file c7ta02600e1.pdf]

## Supporting information

### A MOF-derived self-template strategy toward cobalt phosphides electrodes with ultralong cycle life and high capacity

Guoliang Xia<sup>1</sup>, Jianwei Su<sup>1</sup>, Mengsi Li<sup>1</sup>, Peng jiang<sup>1</sup>, Yang yang<sup>1</sup>, Qianwang Chen<sup>1,2,\*</sup>

<sup>1</sup> Hefei National Laboratory for Physical Science at Microscale, Department of  
Materials Science & Engineering & Collaborative Innovation Center of Suzhou Nano  
Science and Technology, University of Science and Technology of China, Hefei  
230026, China.

<sup>2</sup> High Magnetic Field Laboratory, Hefei Institutes of Physical Science, Chinese  
Academy of Sciences, Hefei 230031, China. \*Correspondence and requests for  
materials should be addressed to Q.C. (email: cqw@ustc.edu.cn).

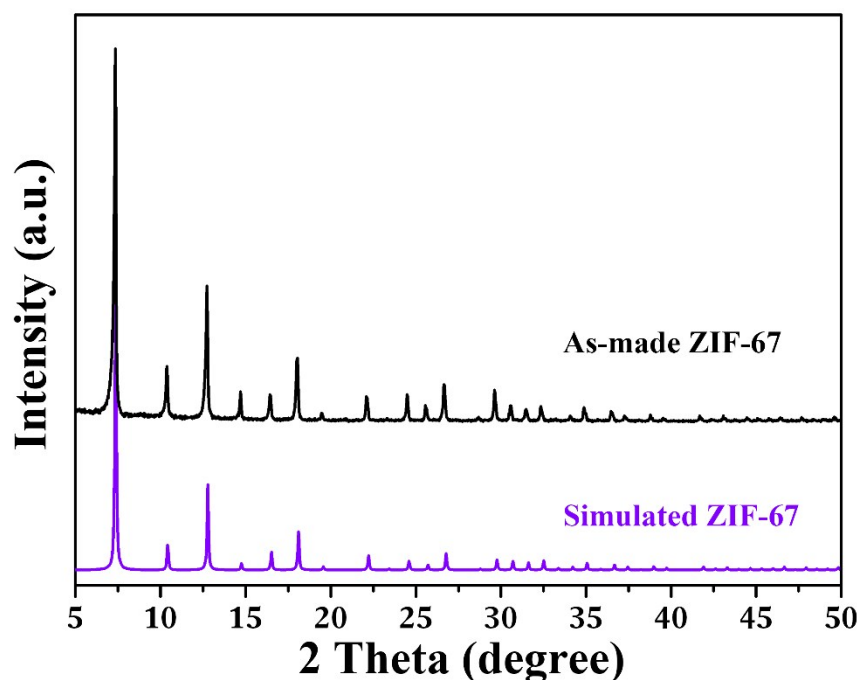

22 **Figure S1.** XRD patterns of the precursor ZIF-67 and simulated ZIF-67.

23

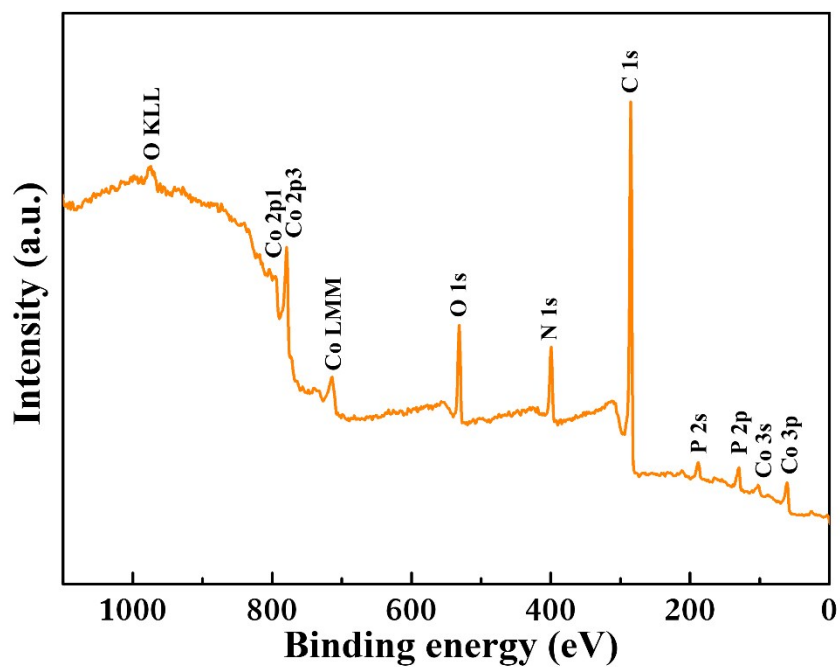

24

25 **Figure S2.** XPS wide scan spectral plot of Co<sub>x</sub>P-NC-800.

26

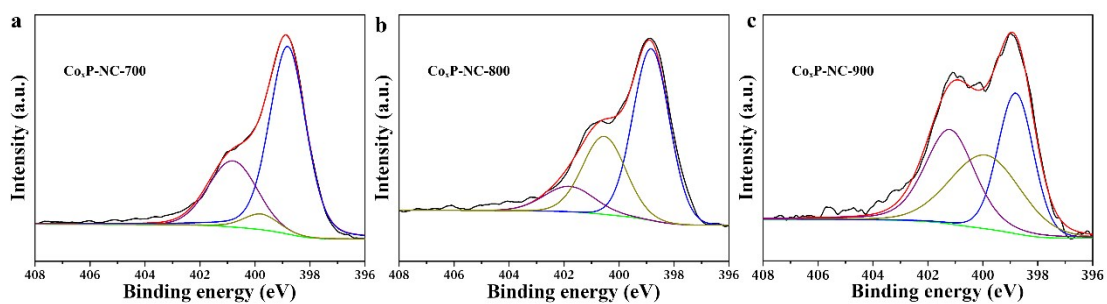

27

28 **Figure S3.** a-c) N<sub>1</sub>s spectra of Co<sub>x</sub>P-NC-700, Co<sub>x</sub>P-NC-800 and Co<sub>x</sub>P-NC-900  
29 electrodes.

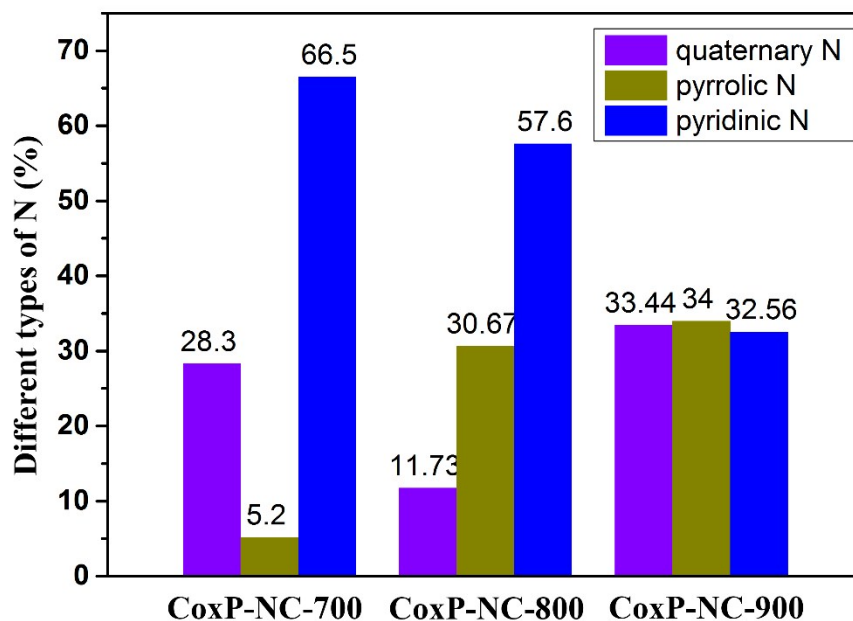

**Figure S4.** Ratio of different types of nitrogen in Co<sub>x</sub>P-NC-700, Co<sub>x</sub>P-NC-800 and Co<sub>x</sub>P-NC-900 electrodes.

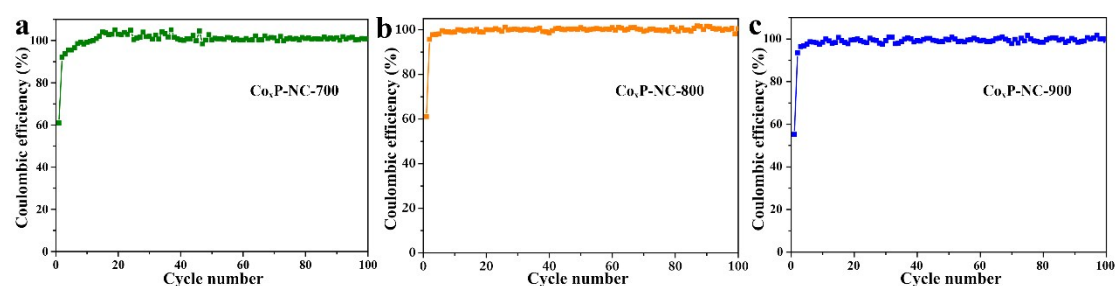

**Figure S5.** a-c) Coulombic efficiency of Co<sub>x</sub>P-NC-700, Co<sub>x</sub>P-NC-800, and Co<sub>x</sub>P-NC-900 electrodes when cycled at current density of 0.1 A g<sup>-1</sup>.

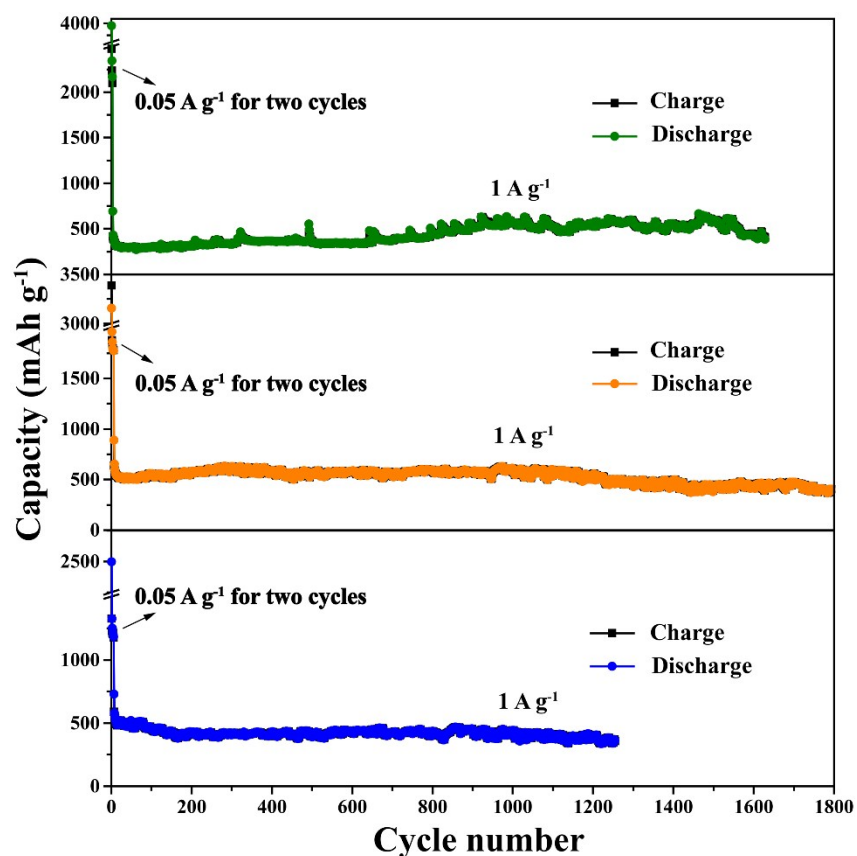

48  
49 **Figure S6.** Cycling performance of  $\text{Co}_x\text{P-NC-700}$ ,  $\text{Co}_x\text{P-NC-800}$ , and  $\text{Co}_x\text{P-NC-900}$   
50 electrodes at current density of  $1 \text{ A g}^{-1}$ .

51  
52 **Table S1.** The comparison of Li-storage performance between  $\text{Co}_x\text{P-NC-800}$  and  
53 other cobalt phosphides electrode materials.

| Name                           | Current density<br>( $\text{mA g}^{-1}$ ) | Charge capacity<br>( $\text{mA h g}^{-1}$ ) | Cycle<br>number | Reference |
|--------------------------------|-------------------------------------------|---------------------------------------------|-----------------|-----------|
| CoP hollow<br>sphere           | 178                                       | 630                                         | 100             | Ref 31    |
| $\text{Co}_2\text{P/graphene}$ | 100                                       | 888                                         | 250             | Ref 36    |
| $\text{CoP@C}$<br>nanorods     | 180/900                                   | 654/530                                     | 100/200         | Ref 37    |
| $\text{CoP/RGO}$               | 200                                       | 960                                         | 200             | Ref 5     |
| $\text{Co}_x\text{P-NC-800}$   | 100                                       | 1224                                        | 100             | This work |
|                                | 1000                                      | 550/400                                     | 1000/1800       | This work |

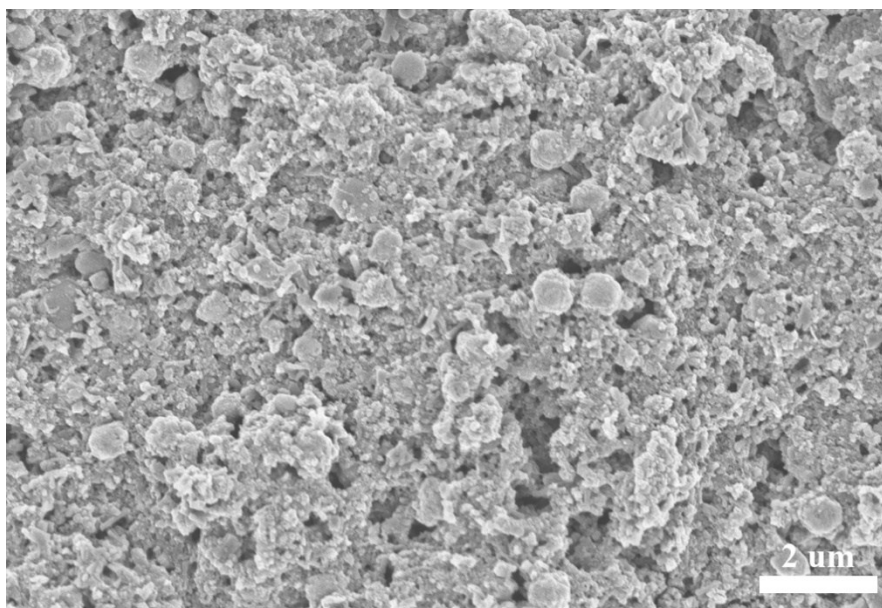

**Figure S7.** SEM images of  $\text{Co}_x\text{P-NC-800}$  electrode after 1800 cycles at a current density of  $1 \text{ A g}^{-1}$ .

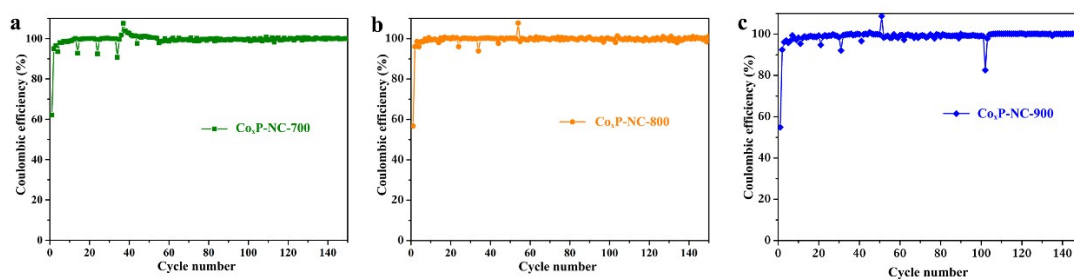

**Figure S8.** Coulombic efficiency of  $\text{Co}_x\text{P-NC-700}$  (a),  $\text{Co}_x\text{P-NC-800}$  (b) and  $\text{Co}_x\text{P-NC-900}$  (c) corresponding to rate performance respectively.

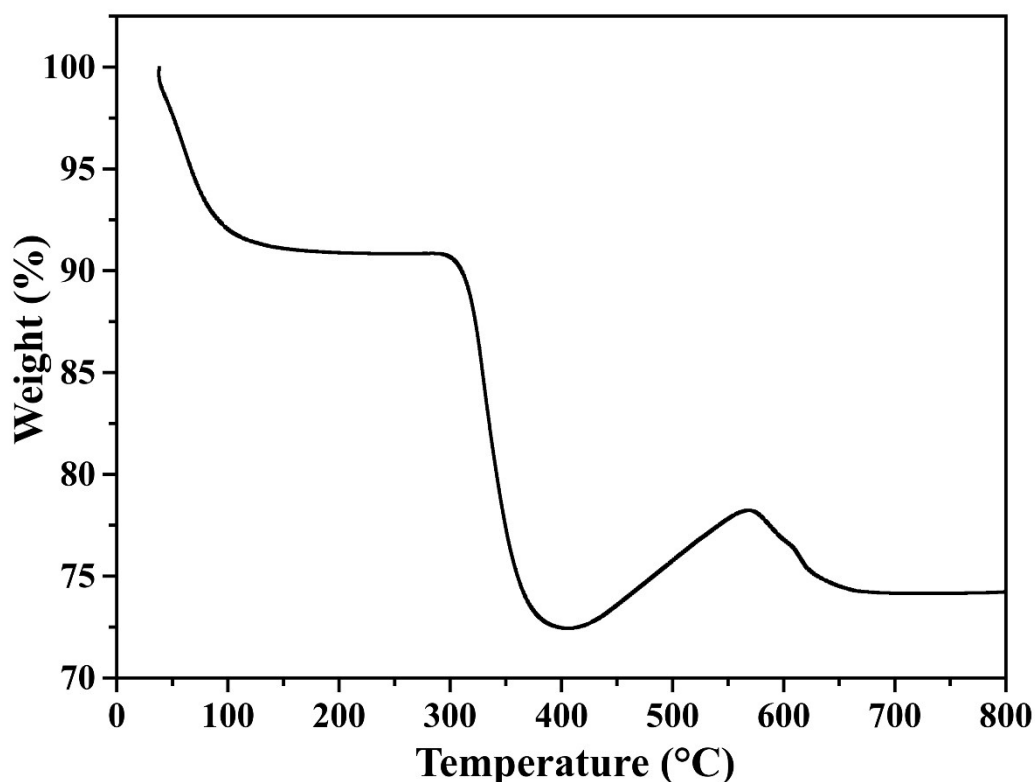

62

63 **Figure S8.** TGA curve of Co<sub>x</sub>P-NC-800 in air.

64 The initial weight loss of 9 % could be the weight of water, which were absorbed  
 65 from the air. Then followed by the combustion of carbon, and gradual oxidation of Co<sub>x</sub>P  
 66 to Co<sub>3</sub>O<sub>4</sub>, P<sub>2</sub>O<sub>5</sub>. Since the Co<sub>x</sub>P nanoparticles are homogeneously distributed in carbon  
 67 network, the combustion of carbon could be the majority between 300-400 °C , and a  
 68 significant weight loss could happen. Then next gradual oxidation can happen. The final  
 69 product is Co<sub>3</sub>O<sub>4</sub> with remaining weight of 74 wt.%. The Co content estimated to be  
 70 59.7 wt.% in the Co<sub>x</sub>P-NC-800 according to the following equation: 74 wt.% \* M(Co)/  
 71 M(Co<sub>3</sub>O<sub>4</sub>) / (1-9 wt.%) ≈ 59.7 wt.%.

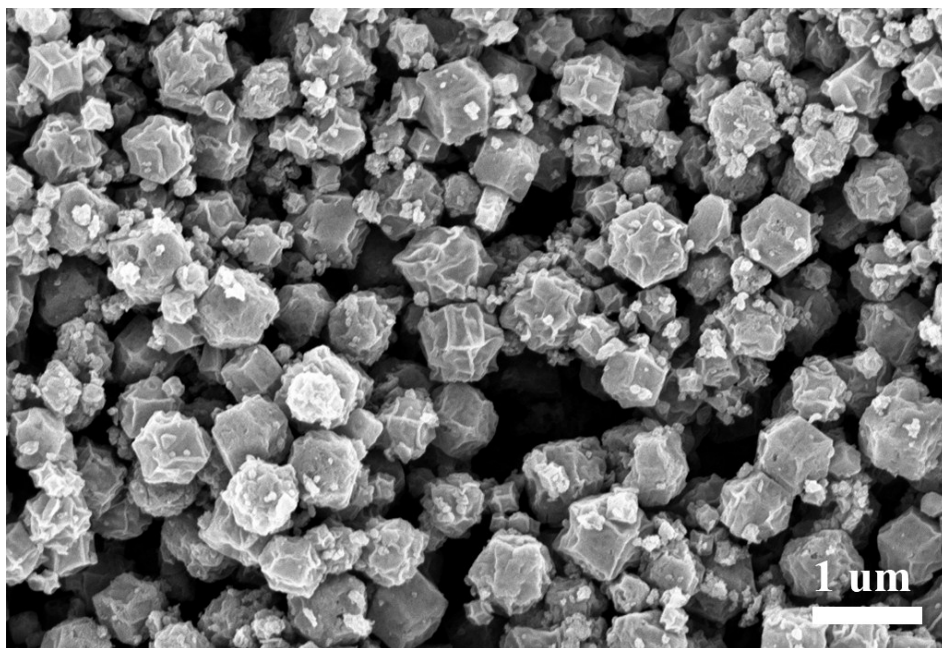

72  
73 **Figure S9.** SEM image of Co<sub>x</sub>P-NC-700 samples.

74

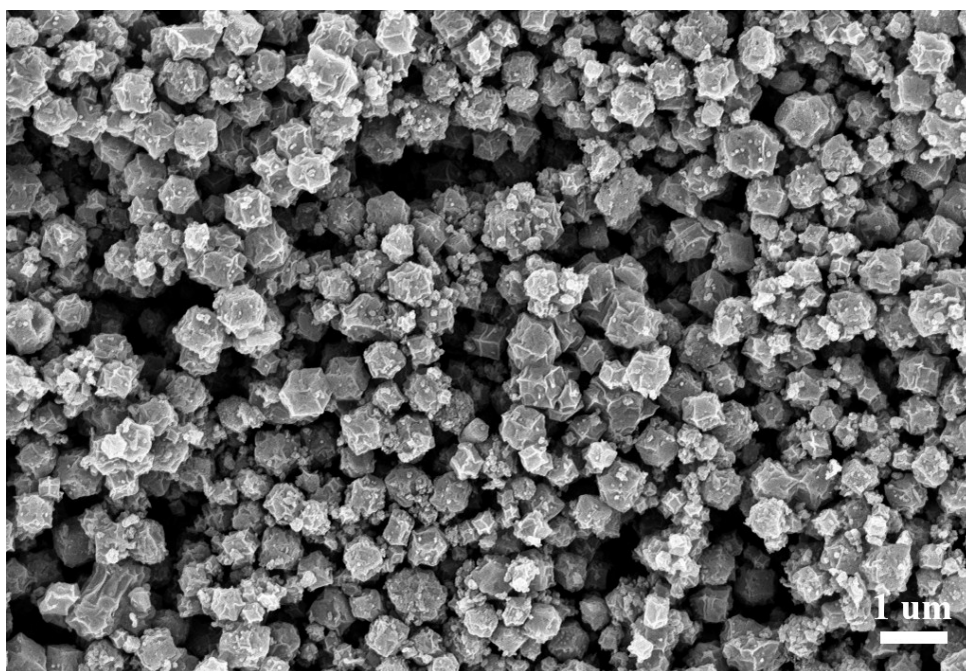

75  
76 **Figure S10.** SEM graph of Co<sub>x</sub>P-NC-900 samples.
